# Supplementary material for: In silico system analysis of physiological traits determining grain yield and protein concentration for wheat as influenced by climate and crop management
Source: PubMed Central journal article supplement (PMC4463803; doi:10.1093/jxb/erv049), 2015-03-24

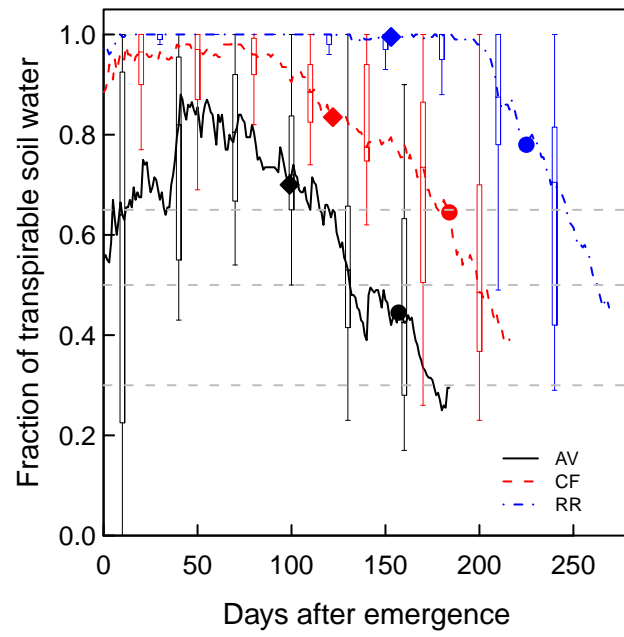

Supplement: supp_erv049_jexbot141044_file002.pdf [file supp_erv049_jexbot141044_file002.pdf]
